# Supplementary material for: Evidence of Recent Intricate Adaptation in Human Populations
Source: PubMed Central journal article supplement (PMC5167553; doi:10.1371/journal.pone.0165870), 2016-12-19

1. 8: 52722670-52723241 RP11-11C20.3

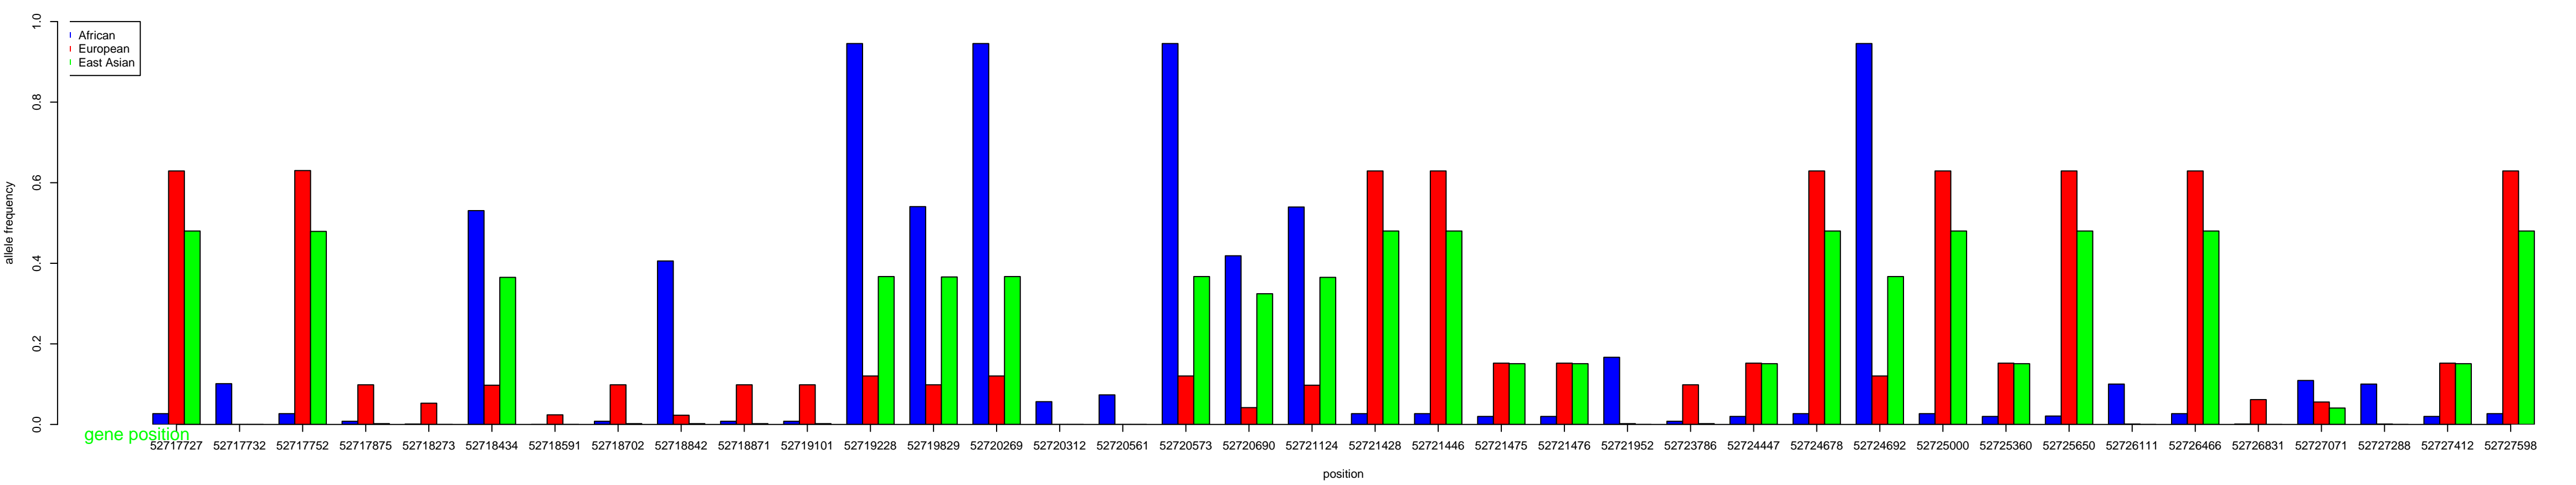

2. 6: 37328961-37329259 RN7SL273P

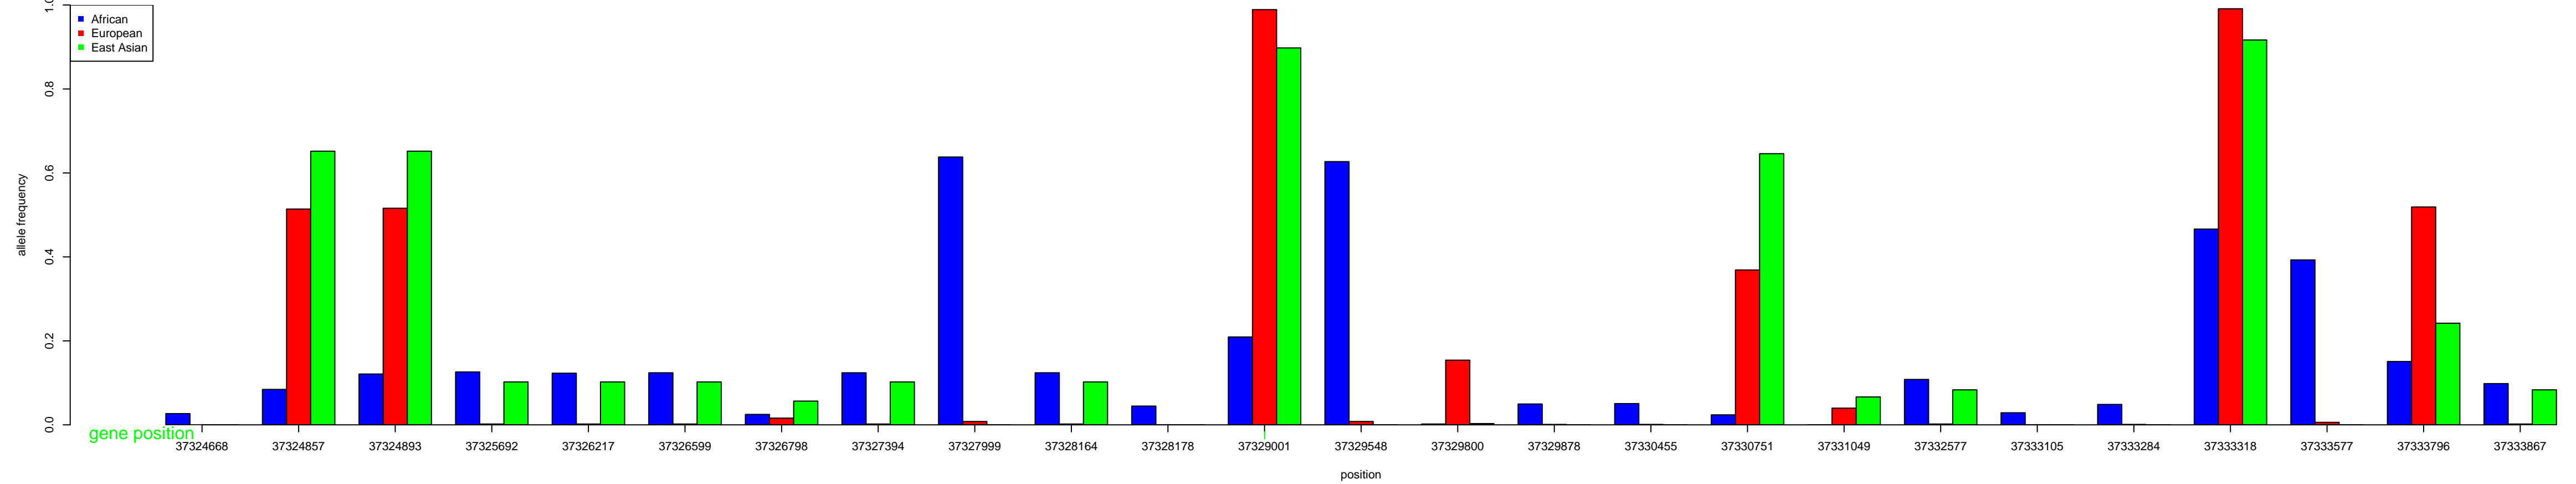

3. 11: 67129885-67130179 RN7SKP239

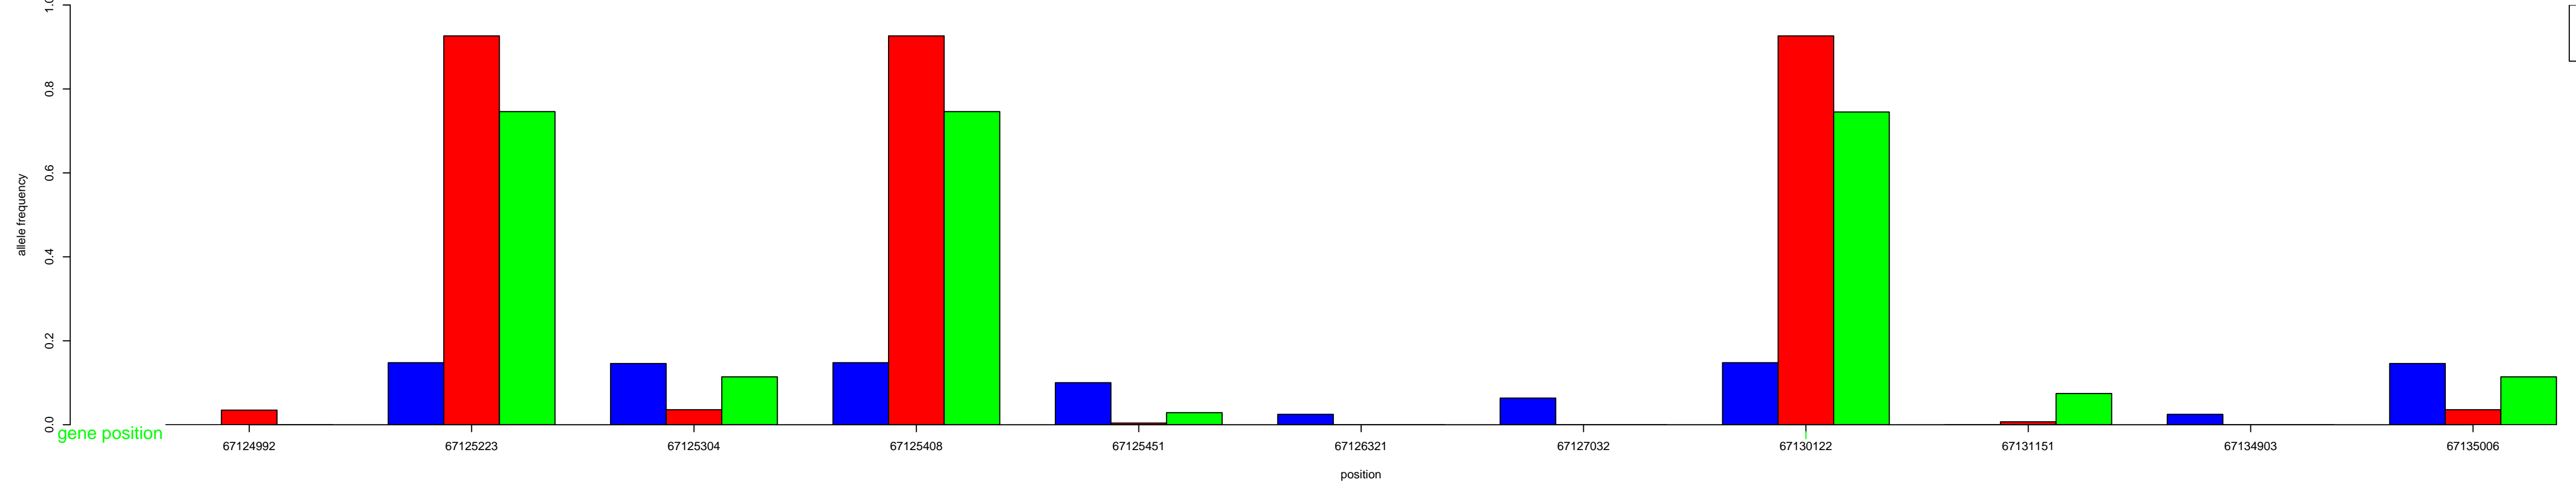

4. 7: 40167720-40167831 Y\_RNA

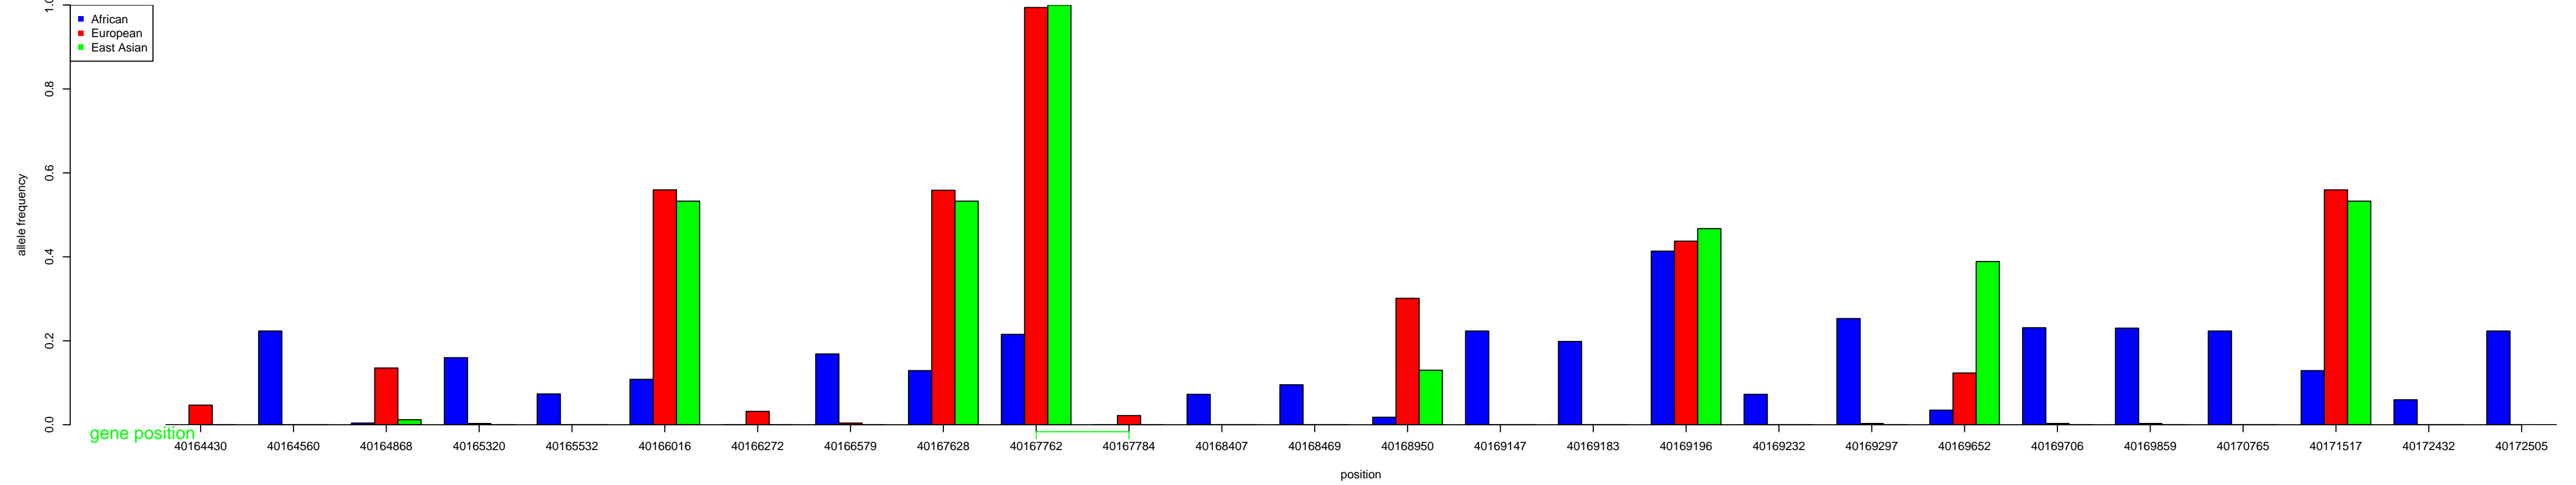

5. 17: 29286582-29286868 RN7SL138P

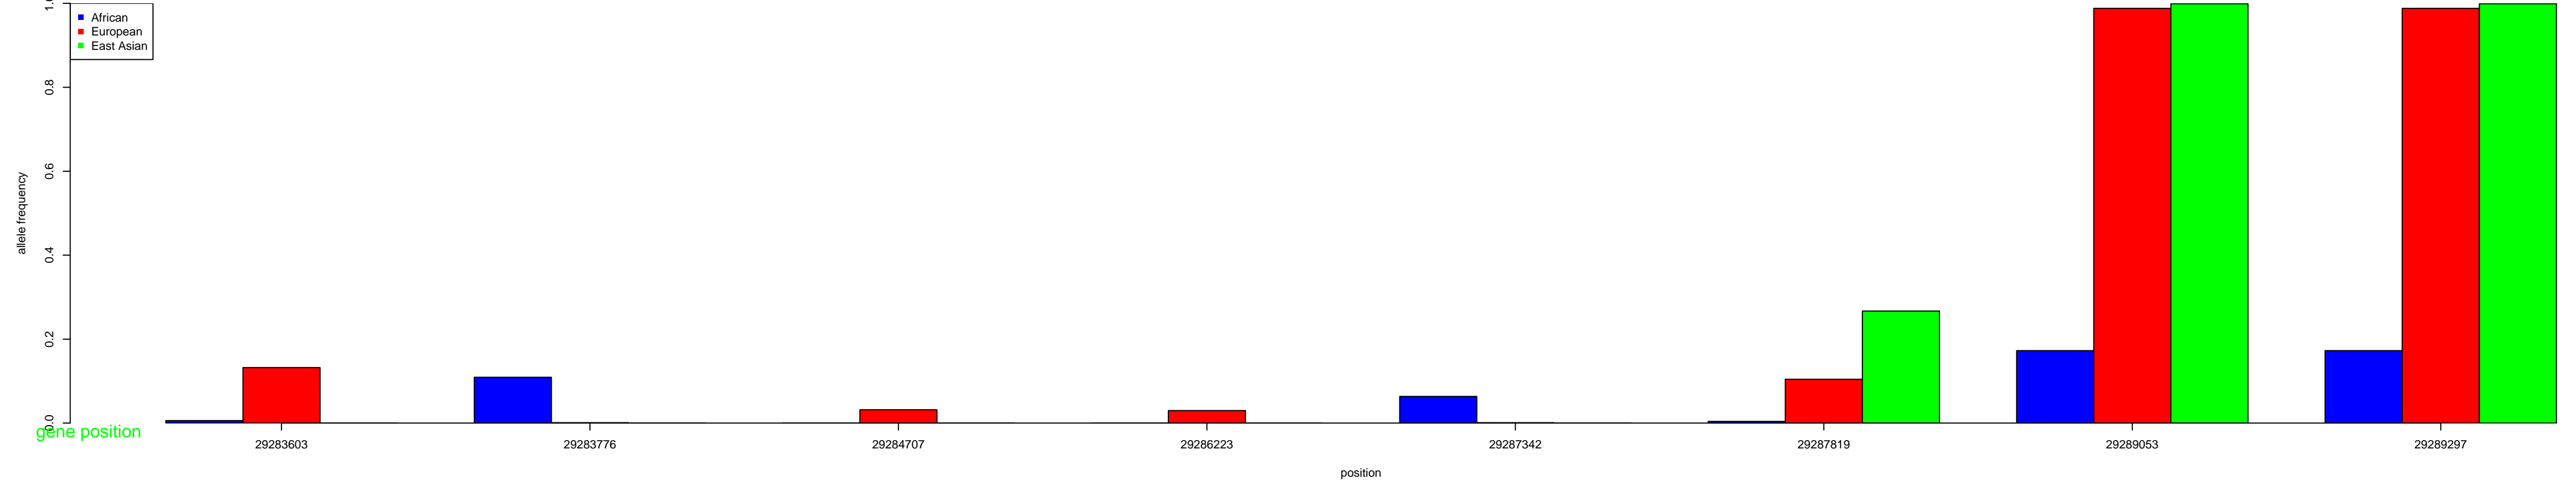

8. 15: 25438468-25438549 SNORD115-13

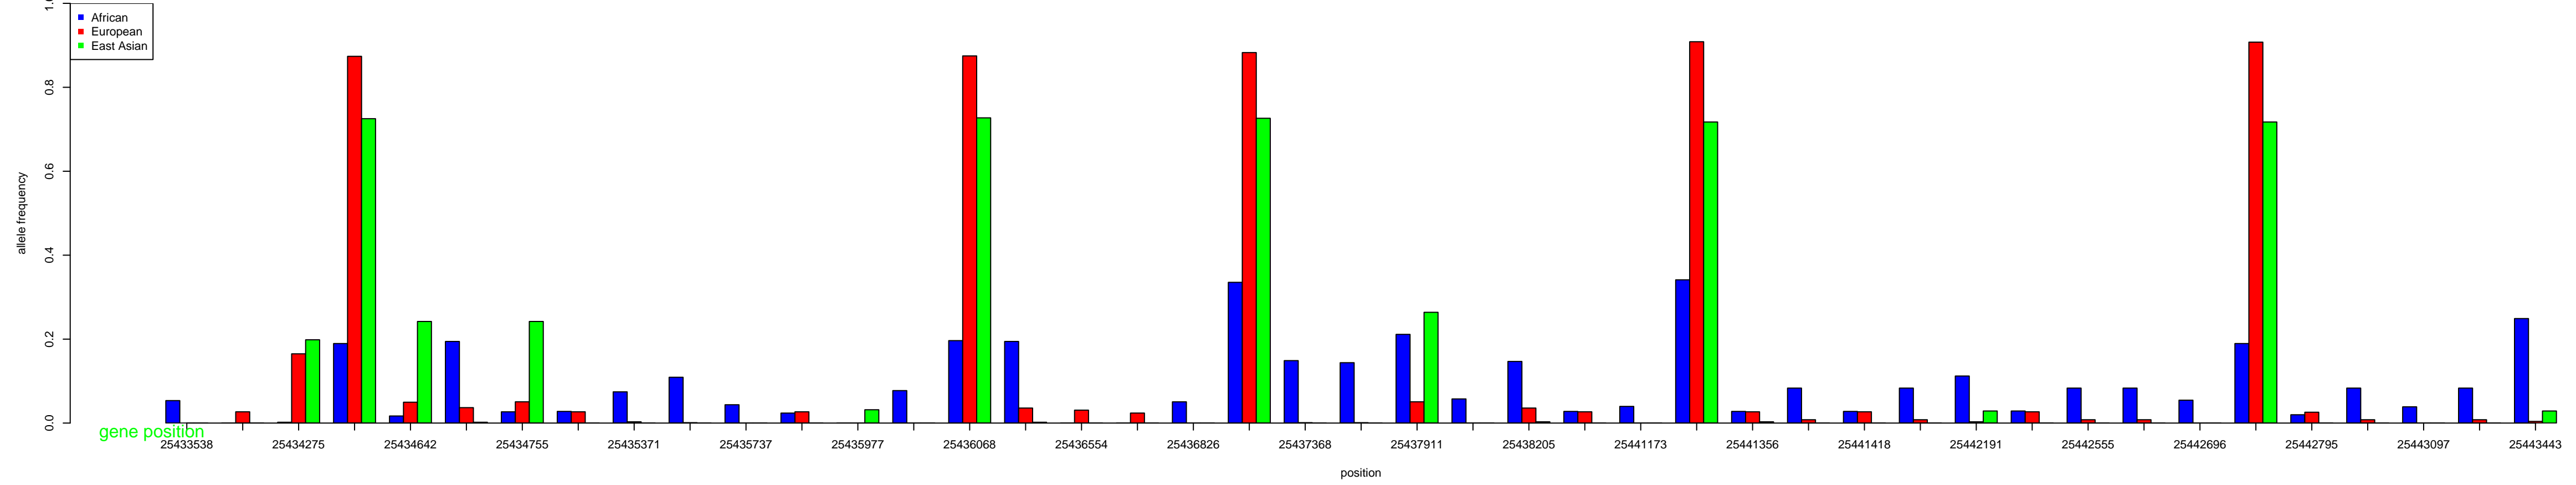

9. 17: 58642101-58643032 RP11-15E18.2

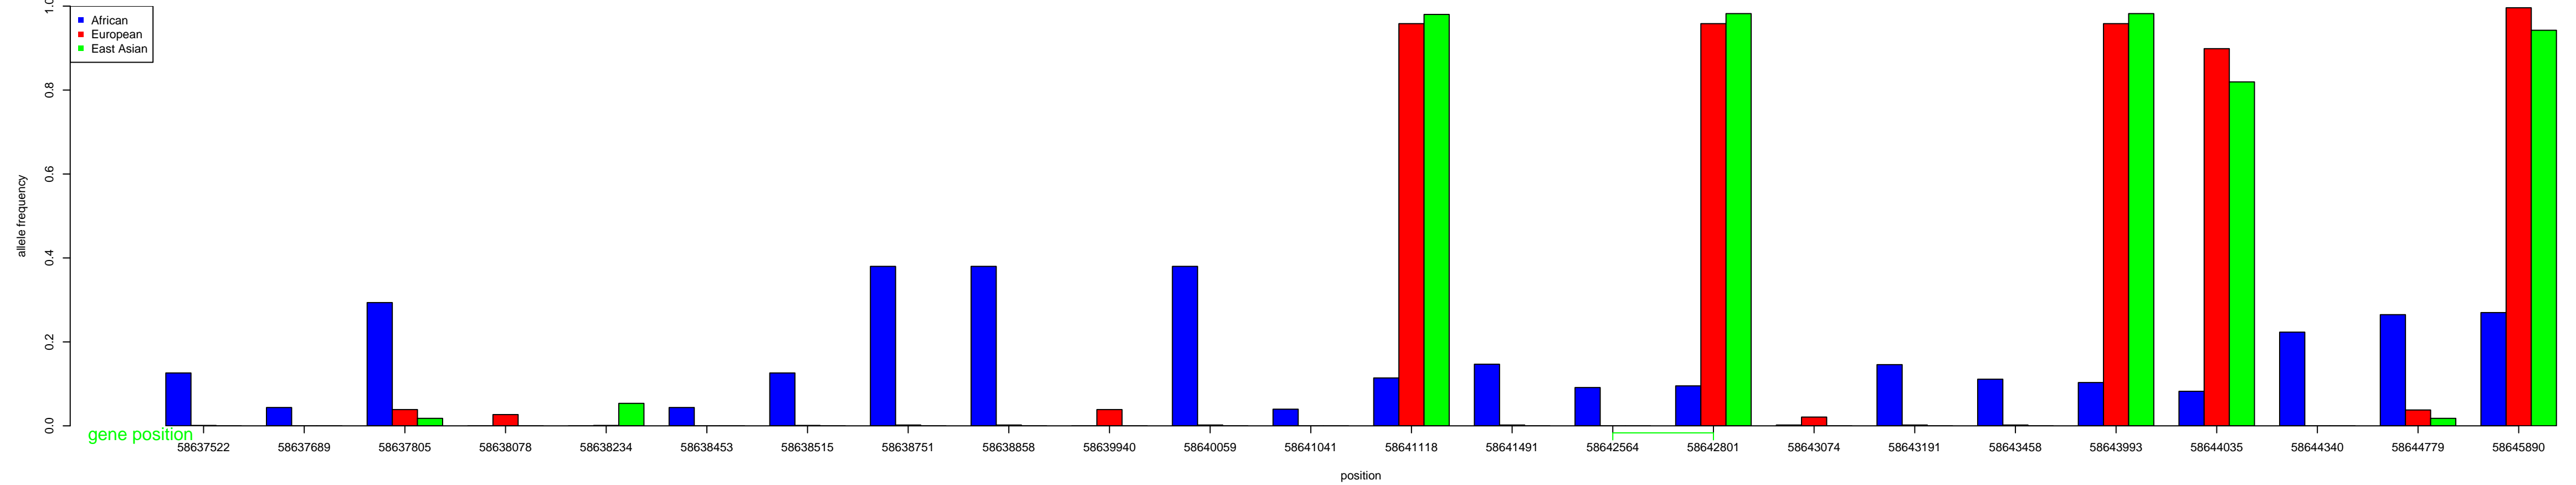

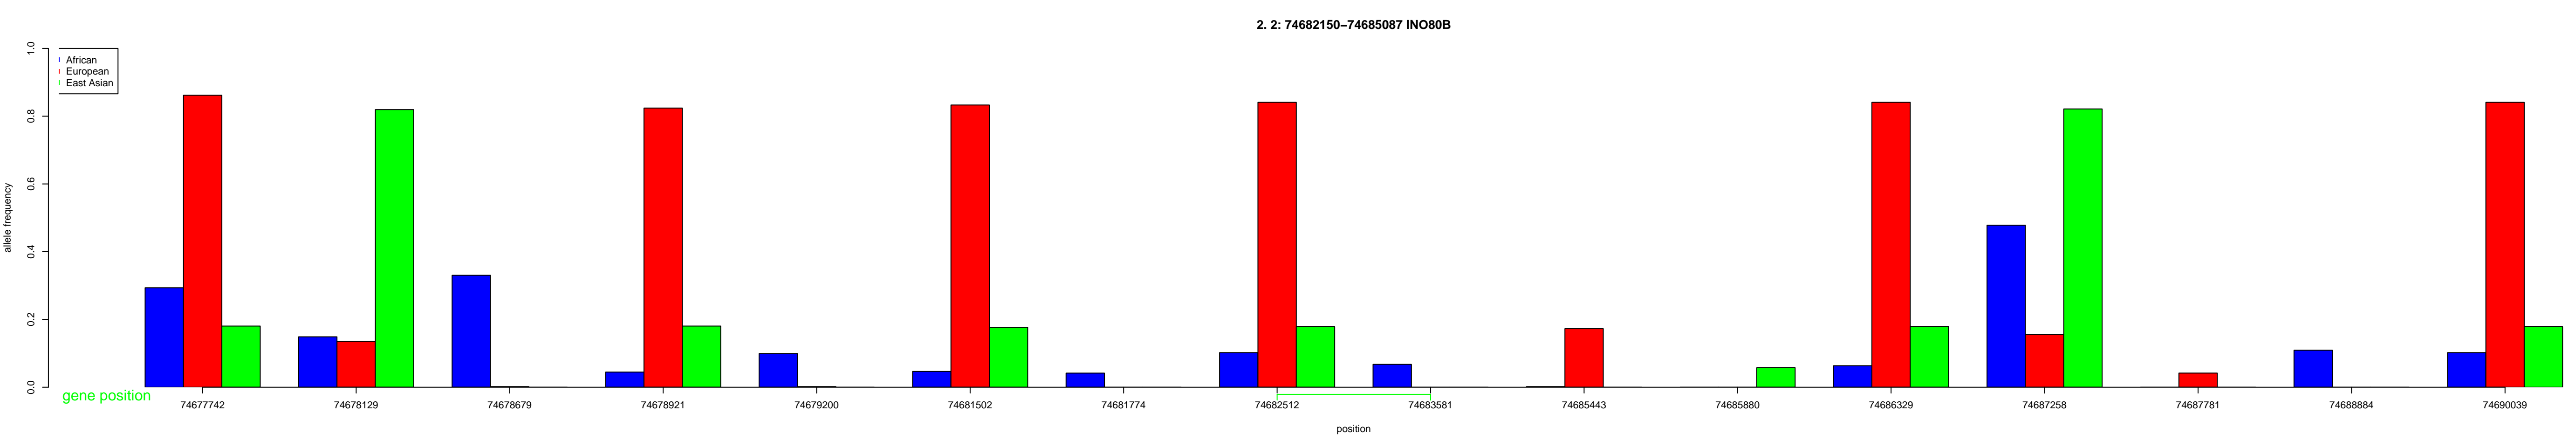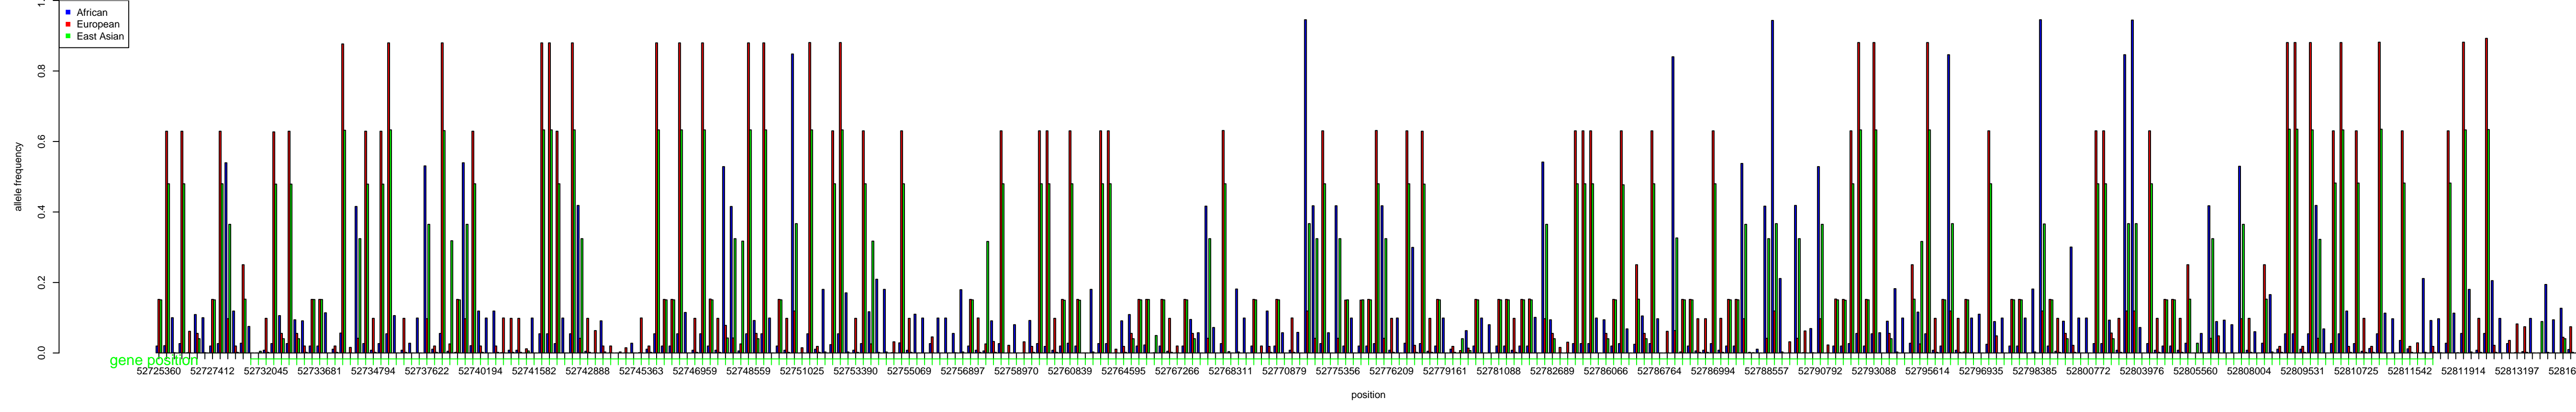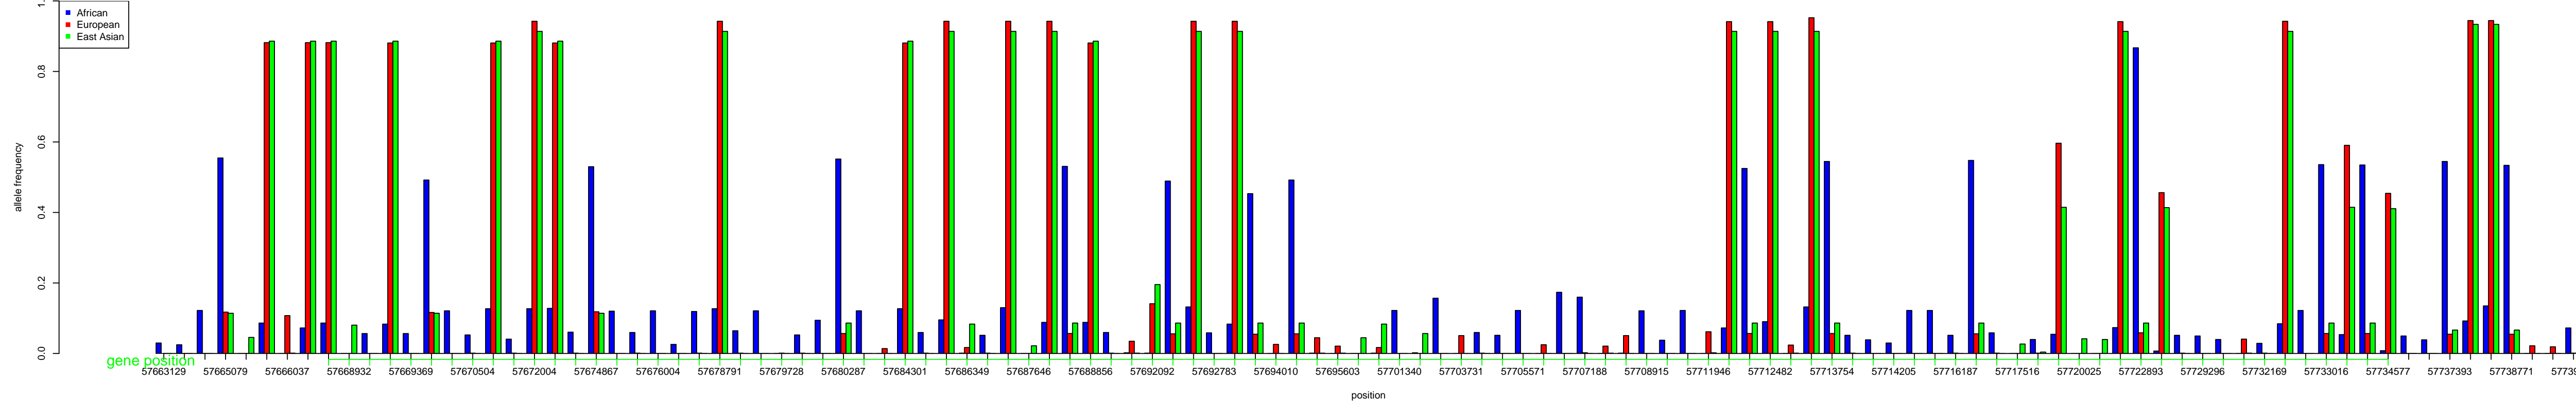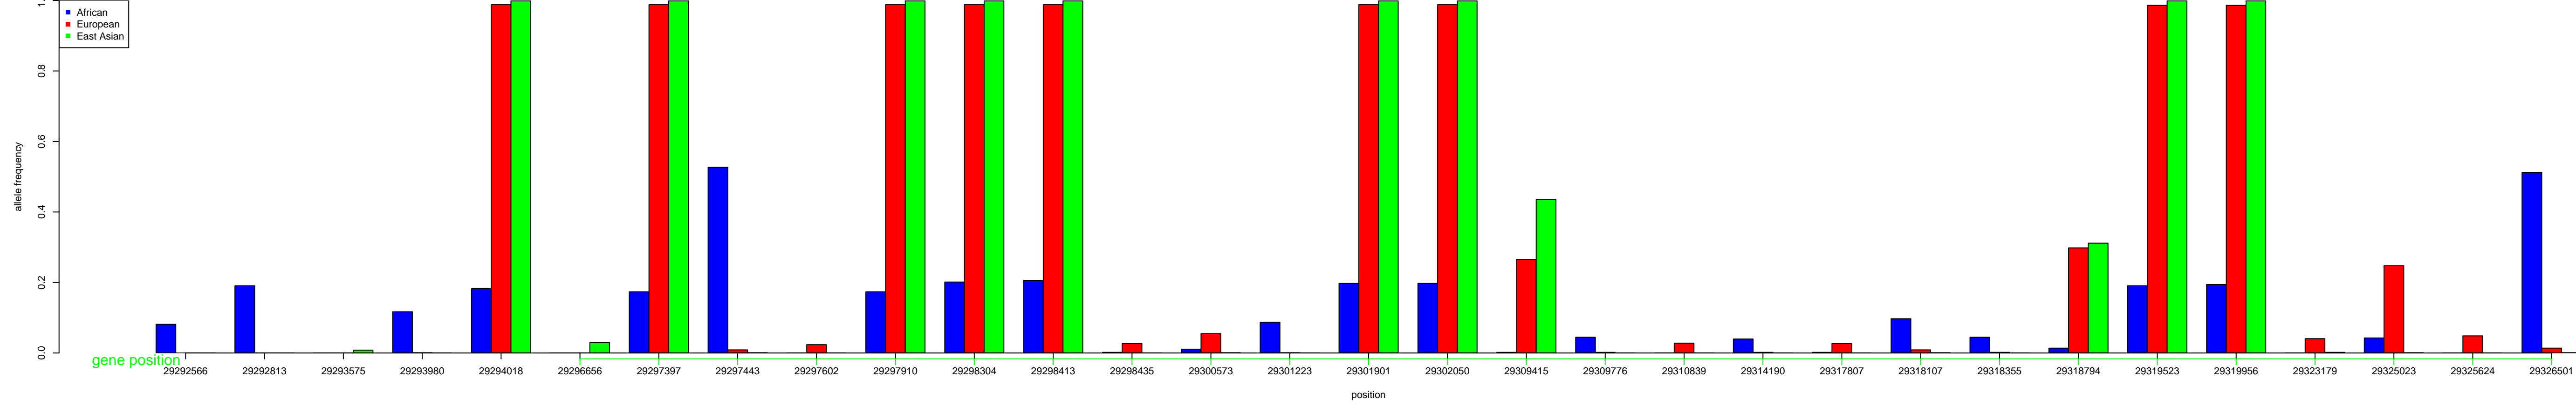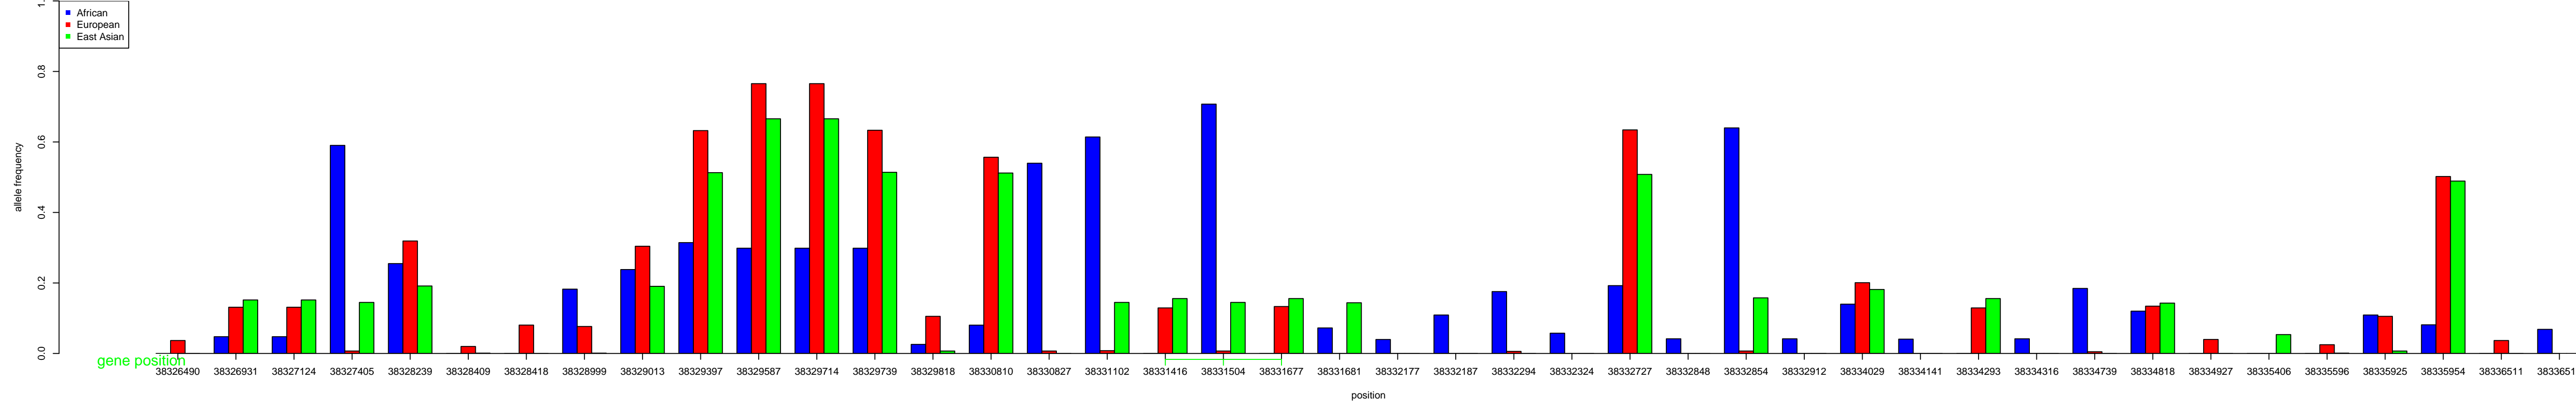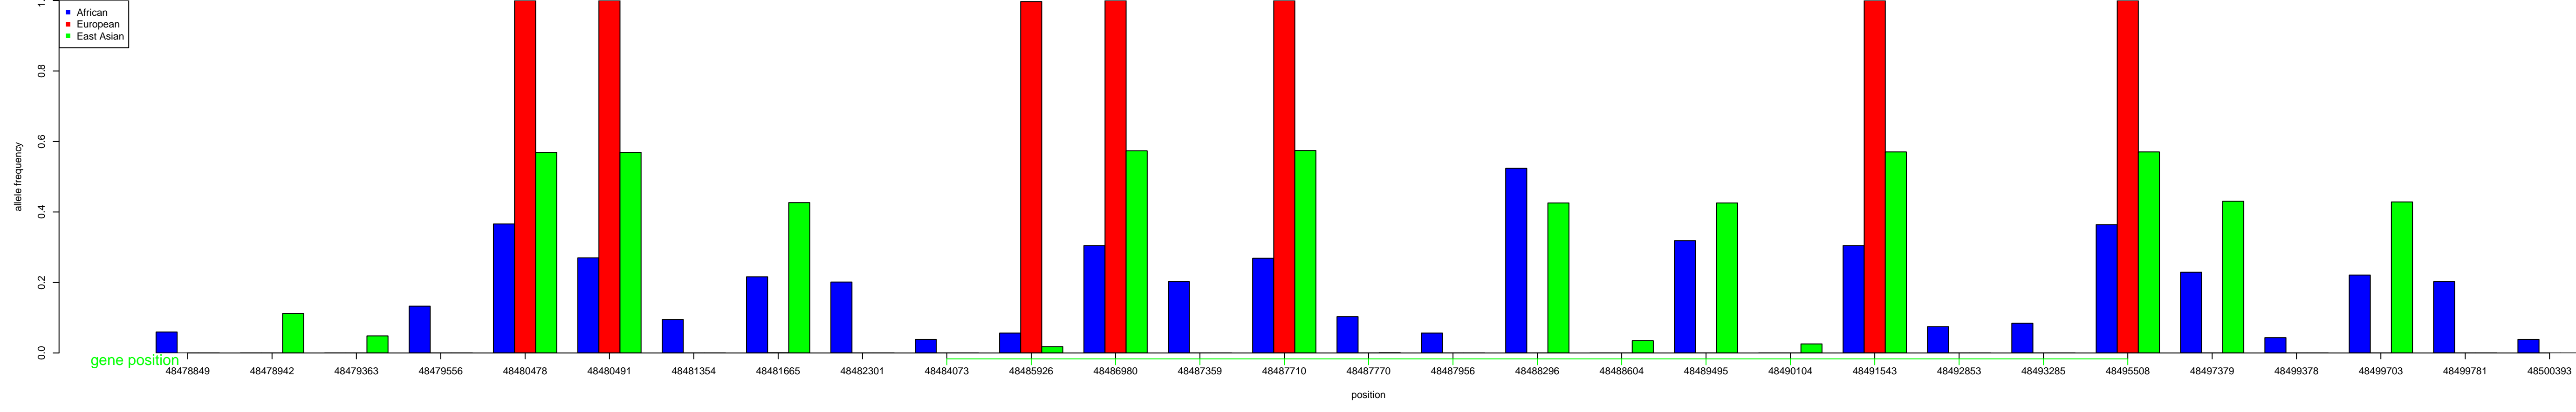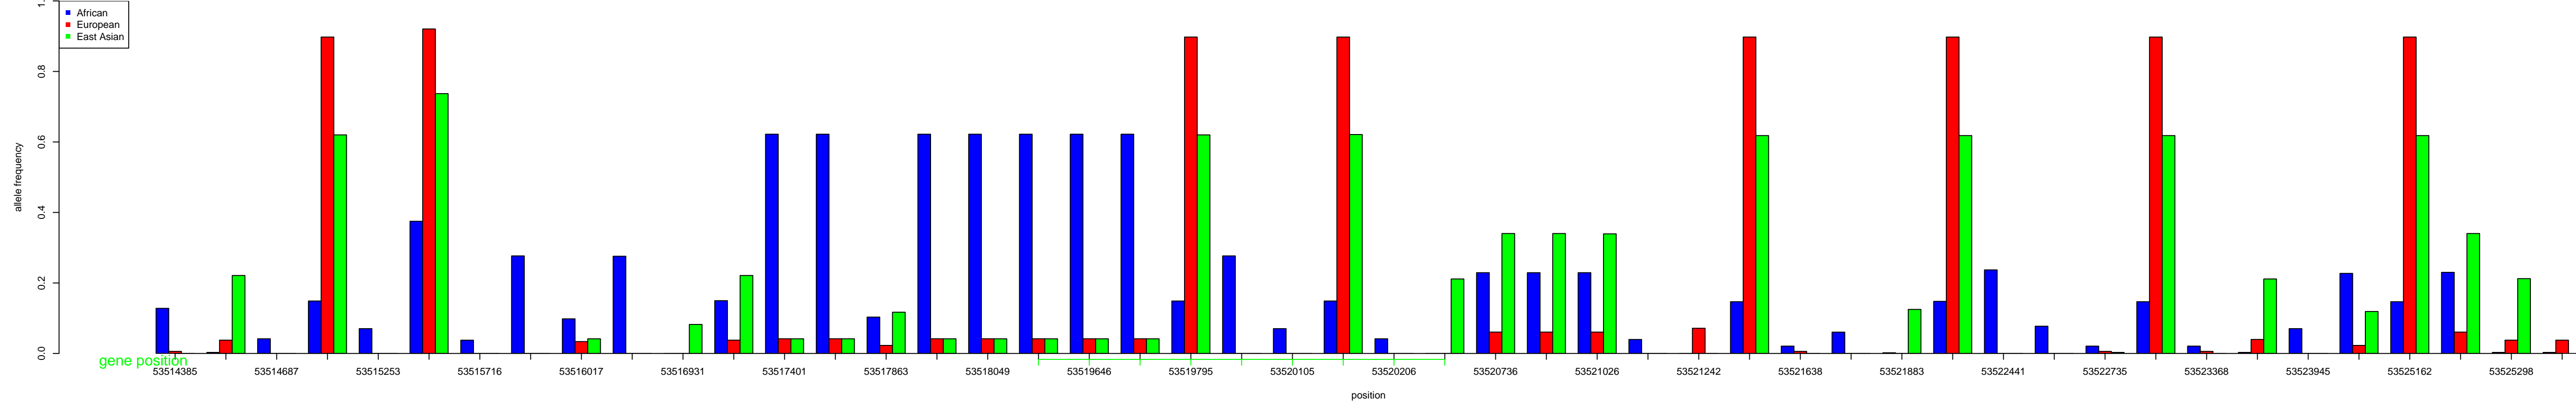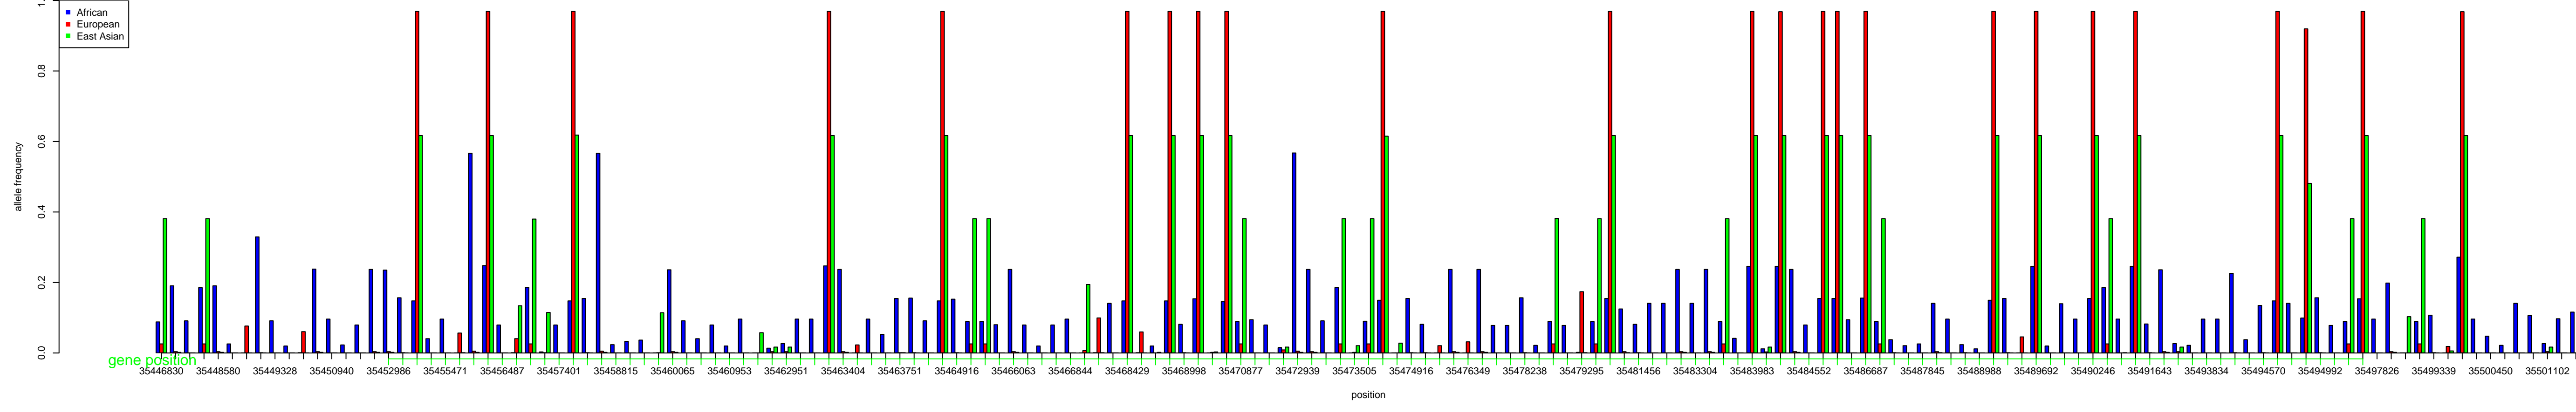

Supplement: pone.0165870.s005.pdf [file pone.0165870.s005.pdf]
