# Supplementary material for: Evidence of Recent Intricate Adaptation in Human Populations
Source: PubMed Central journal article supplement (PMC5167553; doi:10.1371/journal.pone.0165870), 2016-12-19

A. N=200 SN=10000  $F_{ST}$

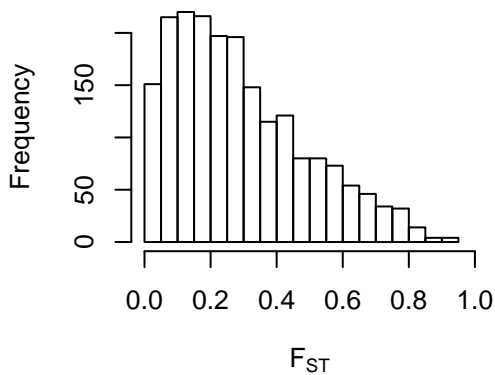

B. N=200 SN=1000  $F_{ST}$

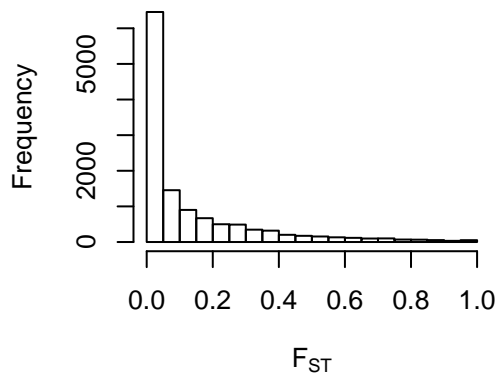

C. N=400 SN=10000  $F_{ST}$

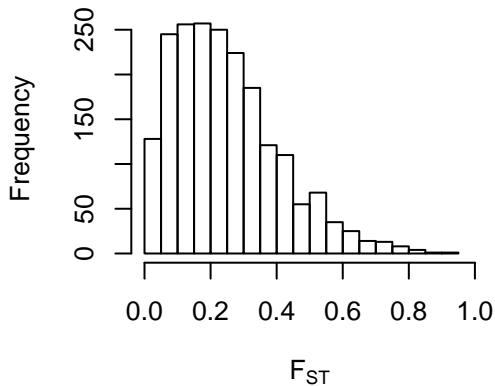

D. N=400 SN=1000  $F_{ST}$

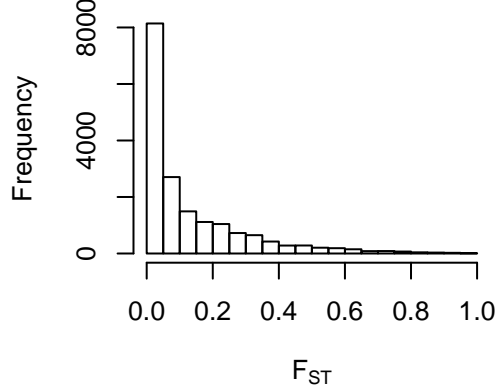

Supplement: pone.0165870.s001.pdf [file pone.0165870.s001.pdf]
