# Supplementary material for: Evidence of Recent Intricate Adaptation in Human Populations
Source: PubMed Central journal article supplement (PMC5167553; doi:10.1371/journal.pone.0165870), 2016-12-19

A.  $F_{ST}$  of 18157 coding genes

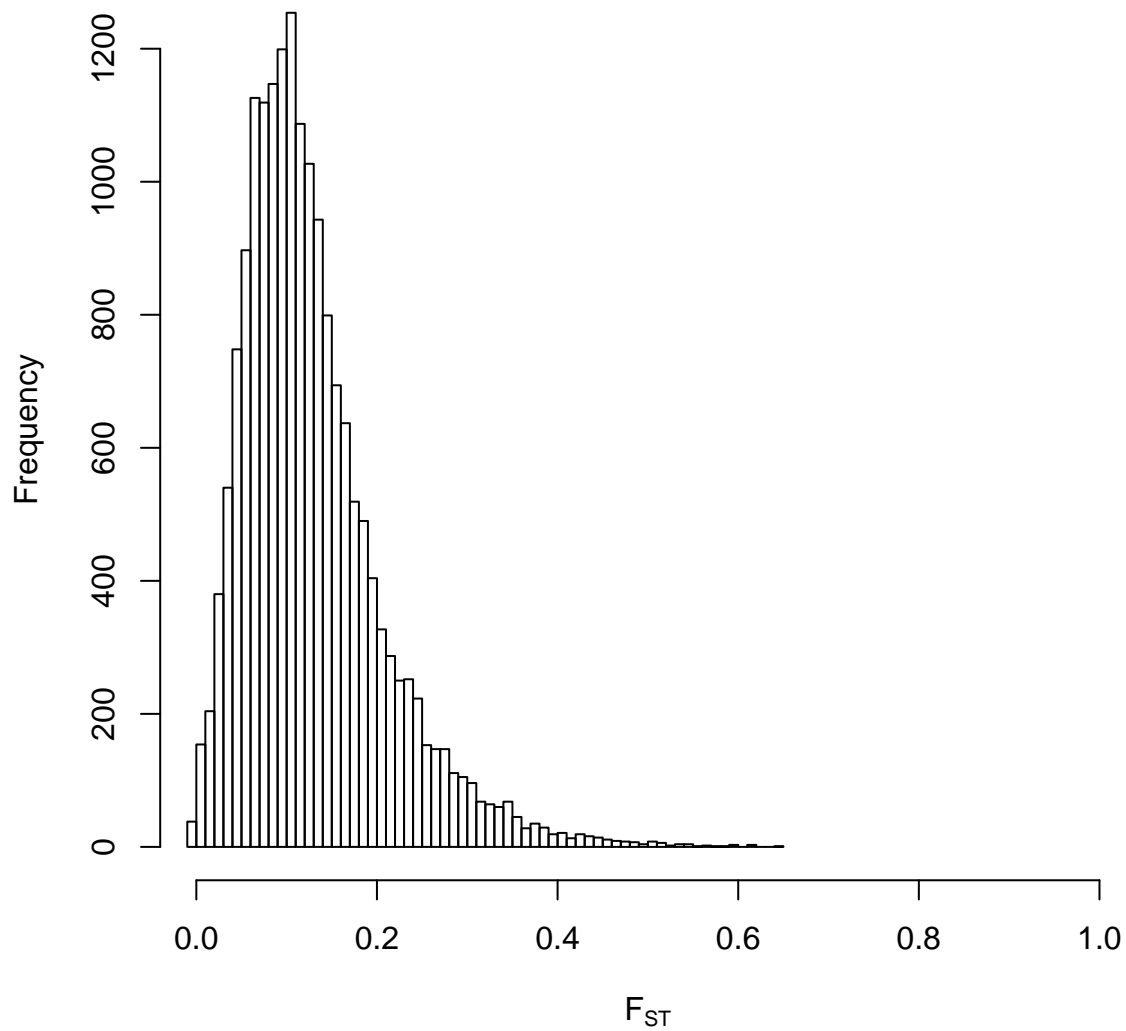

B.  $F_{ST}$  of 37048 noncoding genes

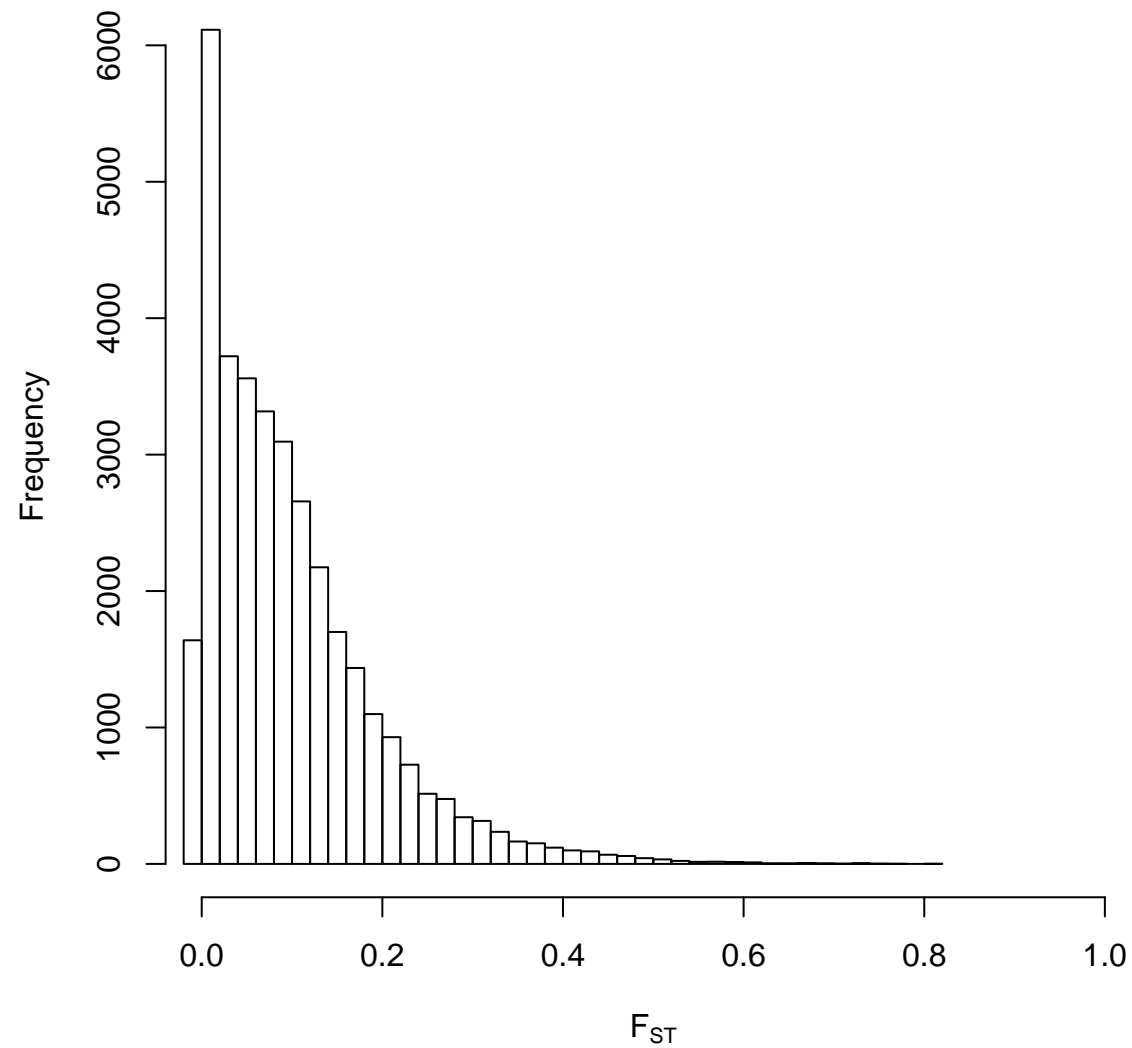

Supplement: pone.0165870.s002.pdf [file pone.0165870.s002.pdf]
