# Supplementary material for: Evidence of Recent Intricate Adaptation in Human Populations
Source: PubMed Central journal article supplement (PMC5167553; doi:10.1371/journal.pone.0165870), 2016-12-19

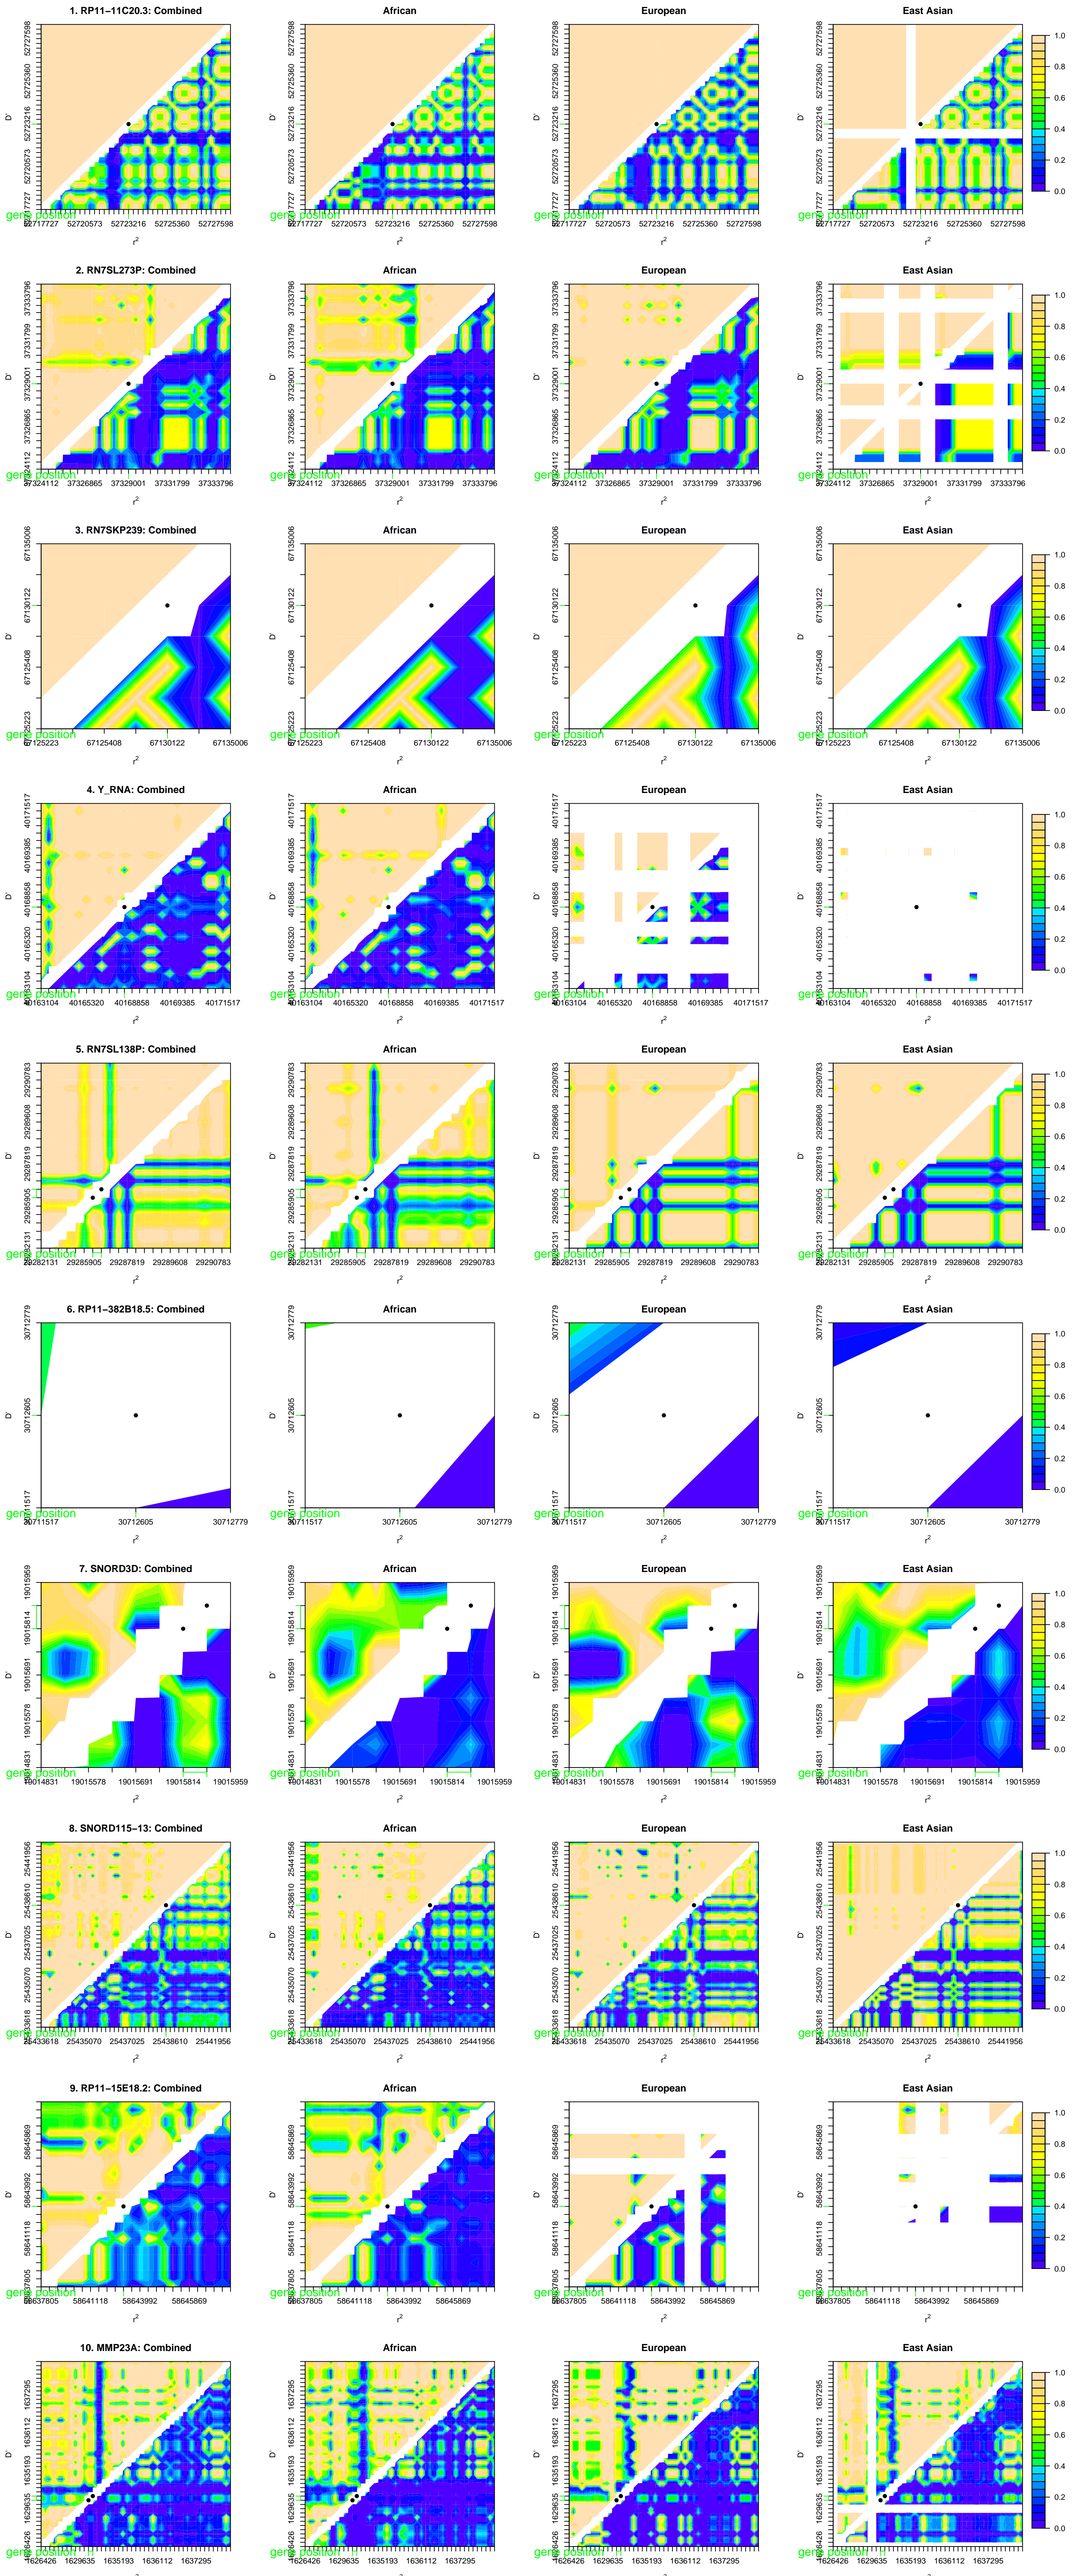

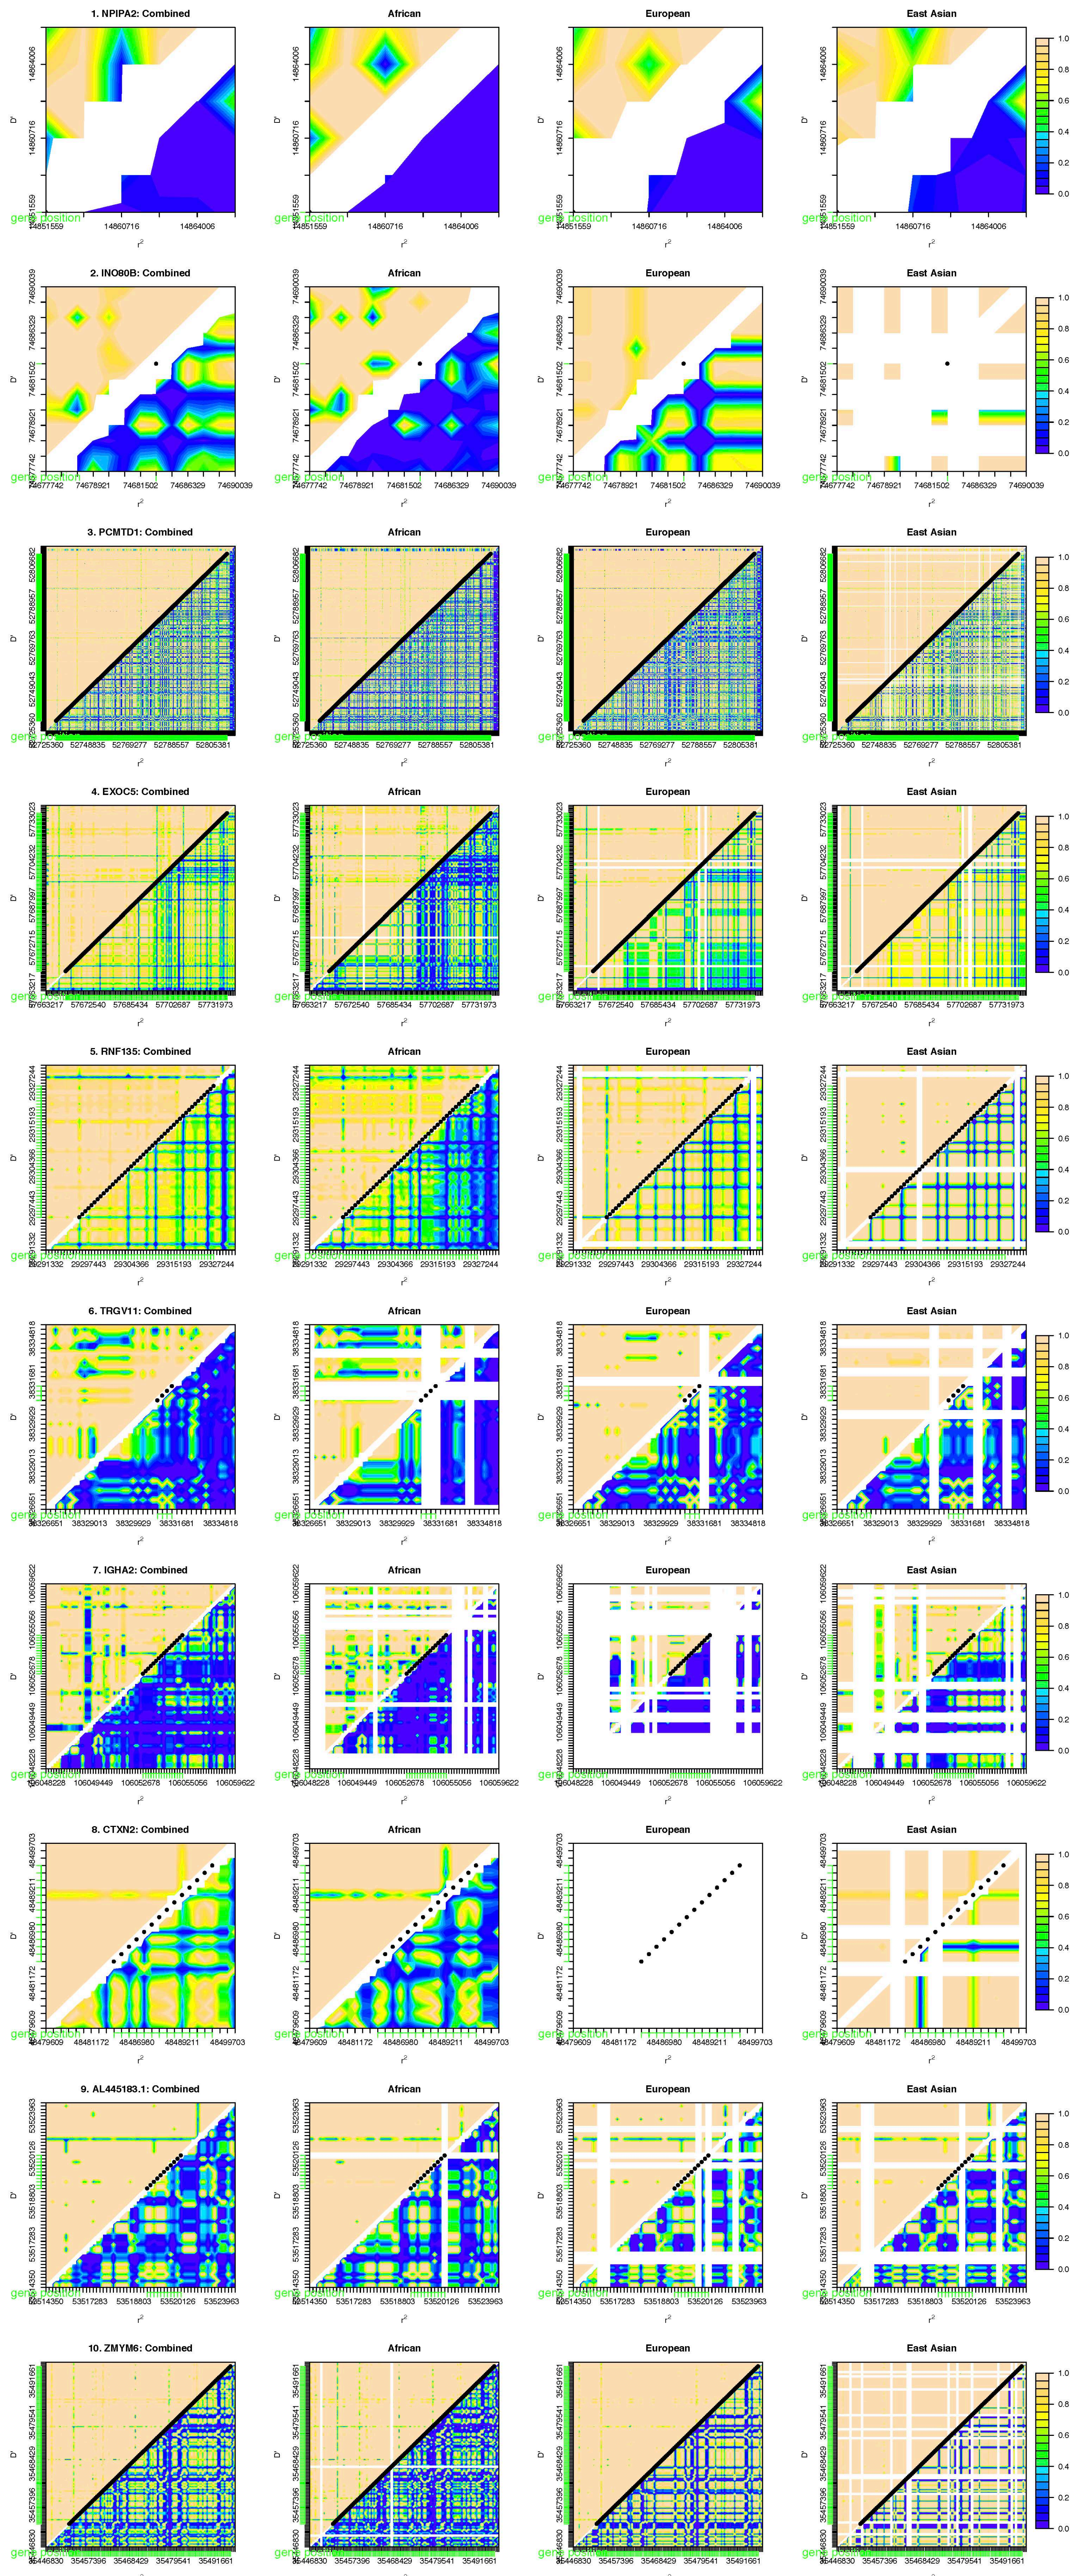

Supplement: pone.0165870.s004.pdf [file pone.0165870.s004.pdf]
