# Supplementary material for: Evidence of Recent Intricate Adaptation in Human Populations
Source: PubMed Central journal article supplement (PMC5167553; doi:10.1371/journal.pone.0165870), 2016-12-19

**AFR: coding genes**

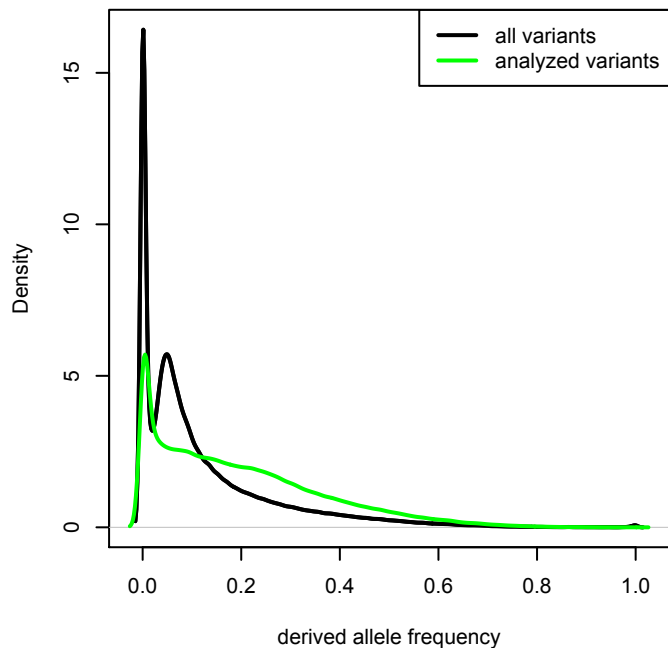

**EUR: coding genes**

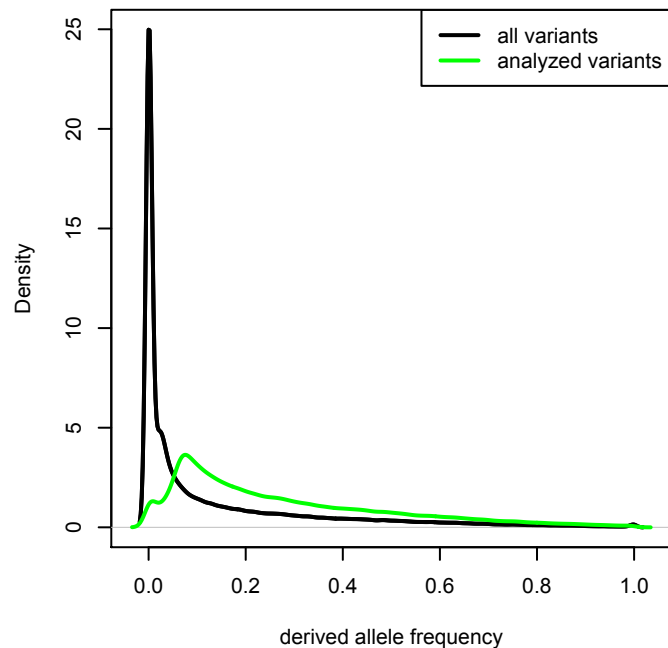

**EAS: coding genes**

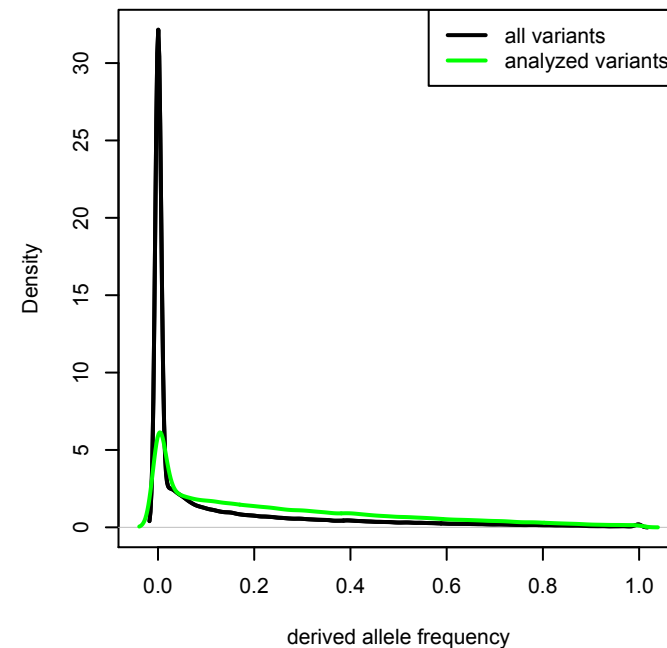

**AFR: noncoding genes**

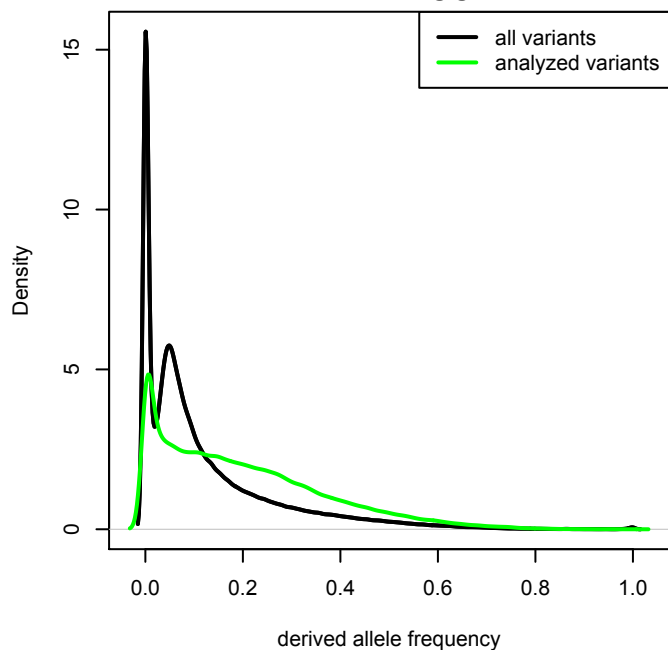

**EUR: noncoding genes**

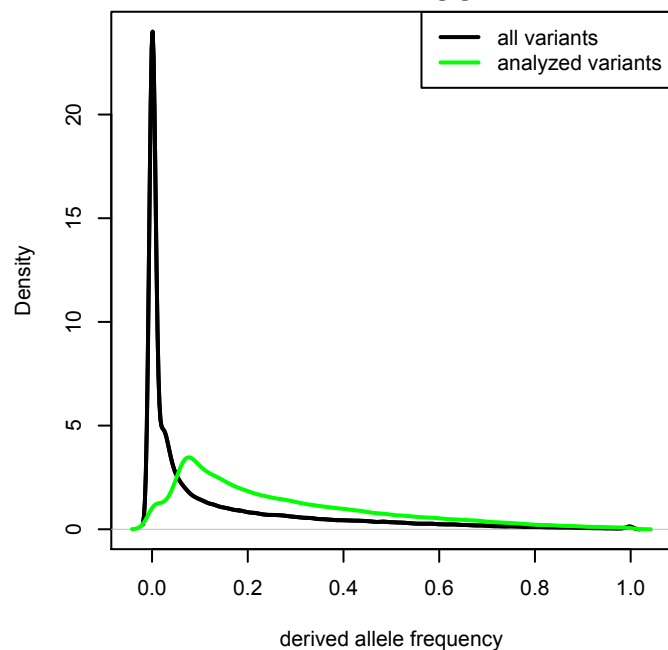

**EAS: noncoding genes**

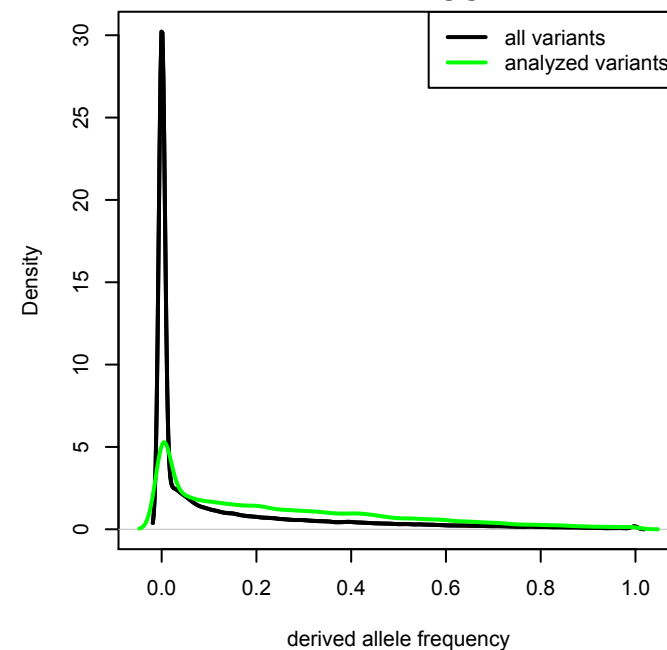

Supplement: pone.0165870.s008.pdf [file pone.0165870.s008.pdf]
